# Supplementary material for: Oxidation state and metasomatism of the lithospheric mantle beneath the Rae Craton, Canada: strong gradients reflect craton formation and evolution
Source: Sci Rep. 2021 Feb 11;11:3684. doi: 10.1038/s41598-021-83261-6 (PMC7878471; doi:10.1038/s41598-021-83261-6)
Supplement: Supplementary file 2 — Supplementary Table 1. [file 41598_2021_83261_MOESM2_ESM.xlsx]

## Sheet: Tabelle1
Supplementary Table 1. Major element compositions of olivine
Sample	TU13-A2-3	TU14-B2	JPI-X2	JP3-X1	JPN2	JPN3A	JPN3b	JPN4	JPN9	JPN11	JPS1	JPS4	JPS6A	JPS6B	K11-A14	K11-A15	K11-A18	K13-A1	K13-A3	K13-A4	K13-A5	K13-B4	K15-A4	NIC	N2B	X04	X05	X07
locality	Pelly Bay	Pelly Bay	Somerset I.	Somerset I.	Somerset I.	Somerset I.	Somerset I.	Somerset I.	Somerset I.	Somerset I.	Somerset I.	Somerset I.	Somerset I.	Somerset I.	Somerset I.	Somerset I.	Somerset I.	Somerset I.	Somerset I.	Somerset I.	Somerset I.	Somerset I.	Somerset I.	Somerset I.	Somerset I.	Somerset I.	Somerset I.	Somerset I.
SiO2	40.87	40.9873	40.3563	40.953	40.9387	40.8	41.23	41.1269	41.298	41.3089	41.1669	39.8514	41.0342	41.596	41.255	40.792	41.1778	41.3743	41.6521	41.285	41.4424	40.9342	41.3144	41.1256	41.433	41.9991	40.9143	40.5862
TiO2	0.01	0.00845455	0.0150526	0.0204348	0.0156875	not det.	not det.	0.0157692	0.01324	0.00511111	0.0153846	0.0184545	0.0126667	0.0142857	0.0155556	0.0112	0.00725926	not det.	0.00591667	not det.	not det.	0.0123333	0.0059375	0.0113704	0.00517391	0.0108182	0.0112857	0.00523077
Al2O3	0.01	0.0130909	0.018	0.016913	0.0979375	not det.	0.024	0.0233846	0.01592	0.023	0.0253846	0.0274091	0.0225	0.0258571	0.0237778	0.031	0.00992593	0.00757143	0.00791667	0.00835714	0.00838095	0.028	0.0140625	0.027963	0.0122174	0.03	0.0302857	0.0256154
Cr2O3	0.02	0.00445455	0.0197895	0.0417391	0.043625	not det.	0.028	0.0403846	0.01456	0.0462222	0.0483846	0.045	0.0294167	0.0348571	0.0471667	0.0558	0.00333333	0.01	0.00525	not det.	0.00538095	0.06125	not det.	not det.	0.0116957	0.0202727	0.0395143	0.0666154
FeO	8.17	9.21727	7.71737	7.78739	8.54375	7.8	7.74	7.98308	7.6392	8.05778	7.53538	7.46818	8.245	8.119	7.93833	7.98	7.34481	7.77571	7.36958	8.17214	7.71571	7.5675	7.34812	7.79185	7.16348	8.10909	7.94629	7.33692
MnO	0.1	0.149636	0.102842	0.118348	0.117812	0.1	0.105	0.113385	0.10368	0.115556	0.106923	0.110545	0.115333	0.101571	0.114111	0.1144	0.112519	0.120857	0.108125	0.129214	0.113095	0.102583	0.112	0.121889	0.101913	0.110727	0.1118	0.112385
MgO	51.12	50.9045	51.0563	51.1787	50.8306	50.3	51.1	51.2846	51.8352	51.3689	51.9	50.9627	51.4625	50.691	51.6728	51.362	51.5926	51.3857	51.6796	50.9393	51.3243	51.5875	51.7019	51.3307	51.8043	52.5364	51.3557	51.4
NiO	0.37	0.304727	0.365158	0.388739	0.368	0.4	0.425	0.374385	0.35208	0.384556	0.411	0.368	0.372917	0.375	0.372167	0.3546	0.388	0.392143	0.382917	0.366643	0.363048	0.391333	0.396125	0.367222	0.398826	0.364091	0.357971	0.406846
CaO	not det.	0.0134545	0.0228421	0.0381739	0.0519375	0.01	0.052	0.0552308	0.01912	0.0442222	0.0453846	0.0487273	0.0430833	0.0397143	0.0585	0.0542	0.00762963	0.00585714	0.00675	0.0160714	0.0103333	0.0526667	0.0091875	0.0605556	0.0183478	0.0349091	0.0531714	0.0491538
Na2O	0.01	0.0444545	0.0304211	0.0190435	0.0295	0	0.04	0.0203846	0.02136	0.0247778	0.0230769	0.0237273	0.0215833	0.0204286	0.0524444	0.0302	0.0348148	0.00585714	0.020625	0.0115	0.00819048	0.0305833	0.05775	0.0711852	0.0128261	0.0281818	0.0346	0.0125385
total	100.68	101.647	99.7041	100.563	101.038	99.41	100.744	101.038	101.312	101.379	101.278	98.9241	101.359	101.018	101.55	100.785	100.679	101.078	101.239	100.928	100.991	100.768	100.959	100.908	100.962	103.244	100.855	100.001
XFo	0.917719	0.907788	0.921832	0.921352	0.913832	0.919969	0.921682	0.919688	0.923637	0.919119	0.924684	0.924036	0.917533	0.917556	0.920655	0.919828	0.926043	0.921753	0.925927	0.917432	0.922224	0.923964	0.926157	0.921526	0.928011	0.92031	0.92013	0.92586
