# Supplementary material for: Oxidation state and metasomatism of the lithospheric mantle beneath the Rae Craton, Canada: strong gradients reflect craton formation and evolution
Source: Sci Rep. 2021 Feb 11;11:3684. doi: 10.1038/s41598-021-83261-6 (PMC7878471; doi:10.1038/s41598-021-83261-6)
Supplement: Supplementary file 3 — Supplementary Table 2. [file 41598_2021_83261_MOESM3_ESM.xlsx]

## Sheet: Tabelle1
Supplementary Table 2. Major element compositions of orthopyroxene
Sample	TU13-A2-3	TU14-B2	JPI-X2	JPN2	JPN3A	JPN3b	JPN4	JPN9	JPN11	JPS1	JPS4	JPS6A	JPS6B	K11-A14	K11-A18	K13-A1	K13-A3	K13-A4	K13-A5	K13-B4	K15-A4	NIC	N2B	X04	X05	X07
locality	Pelly Bay	Pelly Bay	Somerset I.	Somerset I.	Somerset I.	Somerset I.	Somerset I.	Somerset I.	Somerset I.	Somerset I.	Somerset I.	Somerset I.	Somerset I.	Somerset I.	Somerset I.	Somerset I.	Somerset I.	Somerset I.	Somerset I.	Somerset I.	Somerset I.	Somerset I.	Somerset I.	Somerset I.	Somerset I.	Somerset I.
SiO2	57.6783	57.82	56.8156	56.6344	57.61	57.58	57.485	58.0775	57.8067	57.2667	57.0836	57.79	57.601	57.7129	57.77	57.36	57.9275	56.1337	57.66	57.3582	56.9481	56.8582	58.2444	58.944	57.1475	56.9
TiO2	0.0265833	0.0390833	0.062	0.155625	0.095	0.108	0.125375	0.061	0.0686667	0.127667	0.0884545	0.111545	0.10775	0.111286	0.06	0.013	0.0355	0.1025	0.08	0.0476471	0.00625	0.0959091	0.0158889	0.0961	0.116167	0
Al2O3	0.57	0.7115	0.996778	1.10319	1.298	1.31	1.26738	0.97725	1.19889	1.2235	1.14791	1.26218	1.245	1.09943	1.51	1.842	1.49375	3.20167	2.1	1.14206	2.4725	1.33636	0.875889	1.0991	1.43267	1.3
Cr2O3	0.249	0.166417	0.362778	0.5845	0.5	0.494	0.510813	0.35325	0.673444	0.639333	0.602545	0.471273	0.436625	0.608857	0.26	0.31	0.27775	0.478083	0.36	0.663706	0.512625	0.810818	0.328	0.3141	0.512583	0.6
FeO	5.01583	5.79833	4.78889	5.48125	4.89	4.79	4.88125	4.74	4.91889	4.66333	4.57	5.06636	4.943	4.89286	4.93	5.16	4.7425	5.52125	5.03	4.60882	4.94625	4.76636	4.43	4.971	4.88167	4.3
MnO	0.132833	0.1745	0.121444	0.124937	0.104	0.122	0.123313	0.1185	0.124667	0.125	0.118909	0.122818	0.115875	0.125714	0.15	0.159	0.13025	0.149583	0.13	0.119118	0.13175	0.130636	0.116444	0.1159	0.119	0.1
MgO	36.24	35.9475	35.4856	36.2006	35.41	35.13	35.1619	36.175	35.2456	35.6233	35.3591	35.4545	34.426	35.7929	35.81	35.54	35.6925	34.3267	35.85	35.5382	35.3444	34.7845	36.0411	36.674	35.0808	35.1
NiO	0.0946667	0.0666667	0.0835556	0.114125	0.131	0.109	0.106563	0.09925	0.108667	0.118667	0.114	0.108364	0.110625	0.0947143	0.09	0.0973333	0.07675	0.0662917	0.07	0.113	0.0751875	0.103909	0.0973333	0.0824	0.104833	0.1
CaO	0.245083	0.245083	0.402	0.655812	0.738	0.758	0.75525	0.329	0.749778	0.631	0.645727	0.660818	0.64025	0.654429	0.13	0.177	0.459	0.4975	0.22	0.696706	0.288	0.855818	0.318333	0.4711	0.866833	0.6
Na2O	0.085	0.0685	0.119333	0.153625	0.992127	0.127	0.149813	0.10725	0.153444	0.140333	0.137545	0.169545	0.16	0.153571	0.02	0.019	0.02925	0.055	0.05	0.152059	0.061625	0.214364	0.0553333	0.1357	0.205333	0.1
total	100.337	101.038	99.2379	101.208	101.768	100.528	100.567	101.038	101.049	100.559	99.8678	101.217	99.7861	101.247	100.73	100.677	100.865	100.532	101.55	100.44	100.787	99.9569	100.523	102.903	100.467	99.1
Mg#	0.92795	0.91702	0.92962	0.921708	0.928099	0.928943	0.927748	0.931526	0.927392	0.931586	0.932396	0.925785	0.925455	0.928775	0.928305	0.924685	0.930631	0.917235	0.927032	0.932181	0.927207	0.928617	0.935493	0.929333	0.927588	0.935694
