# Supplementary material for: Oxidation state and metasomatism of the lithospheric mantle beneath the Rae Craton, Canada: strong gradients reflect craton formation and evolution
Source: Sci Rep. 2021 Feb 11;11:3684. doi: 10.1038/s41598-021-83261-6 (PMC7878471; doi:10.1038/s41598-021-83261-6)
Supplement: Supplementary file 4 — Supplementary Table 3. [file 41598_2021_83261_MOESM4_ESM.xlsx]

## Sheet: Tabelle1
Supplementary Table 3. Major element compositions of clinopyroxene
Sample	TU13-A2-3	TU16	TU18	JPI-X2	JPN2	JPN3A	JPN3b	JPN4	JPN9	JPN11	JPS4	JPS6A	JPS6B	K13-A1	K13-A3	K13-A4	K13-A5	X04	X05
locality	Pelly Bay	Pelly Bay	Pelly Bay	Somerset I.	Somerset I.	Somerset I.	Somerset I.	Somerset I.	Somerset I.	Somerset I.	Somerset I.	Somerset I.	Somerset I.	Somerset I.	Somerset I.	Somerset I.	Somerset I.	Somerset I.	Somerset I.
SiO2	54.6358	55.04	53.4612	53.9315	54.3526	54.86	54.4	54.851	54.855	54.5822	52.6917	55.18	55.136	54.9722	55.2575	53.5043	54.1085	55.8008	54.3332
TiO2	0.066	0.0815	0.047375	0.135308	0.308316	0.156	0.185	0.2766	0.1362	0.138	0.216667	0.24	0.259611	0.0665	0.09025	0.379214	0.786769	0.224583	0.211864
Al2O3	2.68083	2.9275	3.8225	2.75077	2.24447	2.28	2.29	2.399	2.937	2.22444	2.185	3.1	3.089	1.72311	1.94625	4.40357	5.42231	2.85975	2.73318
Cr2O3	2.39	2.645	1.30863	2.33692	2.39876	1.81	1.74	1.86	2.059	2.60444	2.38833	2.13	2.023	0.569611	0.83775	1.14557	1.90538	1.60683	1.74818
FeO	2.34417	2.1625	1.55375	2.25846	2.76316	2.45	2.52	2.494	2.319	2.39556	2.20333	2.61	2.573	1.24244	1.146	1.67714	1.23585	2.55417	2.645
MnO	0.0864167	0.0785	0.075875	0.0756923	0.0992895	0.104	0.076	0.091	0.0777	0.0966667	0.0853333	0.1	0.0939444	0.0703333	0.06375	0.0790714	0.0705385	0.08875	0.0969545
MgO	15.4175	15.0975	15.8062	15.7338	17.8905	17.61	17.63	17.455	15.82	17.12	16.795	16.68	16.401	17.2961	16.9525	15.8114	14.1923	18.3908	17.4841
NiO	0.0413333	0.03025	0.042375	0.0490769	0.0543947	0.085	0.042	0.0525	0.0425	0.0598889	0.04	0.04	0.0433889	0.0336111	0.016	0.0288571	0.0333846	0.04125	0.0495
CaO	19.3025	19.3325	22.4238	20.2392	18.4802	19.22	19.48	19.337	19.357	19.1189	19.8317	18.29	18.515	23.7956	23.43	21.4329	19.6269	18.3697	18.4009
Na2O	2.76583	2.8725	1.2965	2.33	1.86005	1.63	1.68	1.666	2.544	1.79444	1.8	2.29	2.266	0.674778	0.905	1.58936	2.87231	2.028	1.84545
K2O	not det.	0.009	0.0095	not measured	not measured	not measured	not measured	not measured	not measured	not measured	not measured	not measured	not measured	not det.	0.00725	not det.	not det.	not measured	0.034
total	99.7304	100.277	99.8478	99.8408	100.452	100.205	100.043	100.482	100.147	100.135	98.237	100.66	100.4	100.444	100.652	100.051	100.254	100.262	100.262
Mg#	0.921407	0.925622	0.947737	0.925475	0.920264	0.927602	0.925765	0.925792	0.924015	0.927215	0.931449	0.919302	0.91911	0.961263	0.963462	0.943837	0.953425	0.927719	0.921772
Cr#	0.37427	0.377403	0.186785	0.36305	0.417602	0.347521	0.337652	0.342183	0.31989	0.439943	0.423084	0.315531	0.30526	0.181526	0.22408	0.148601	0.190781	0.27377	0.300273
