# Supplementary material for: Oxidation state and metasomatism of the lithospheric mantle beneath the Rae Craton, Canada: strong gradients reflect craton formation and evolution
Source: Sci Rep. 2021 Feb 11;11:3684. doi: 10.1038/s41598-021-83261-6 (PMC7878471; doi:10.1038/s41598-021-83261-6)
Supplement: Supplementary file 5 — Supplementary Table 4. [file 41598_2021_83261_MOESM5_ESM.xlsx]

## Sheet: Tabelle1
Supplementary Table 4. Major element composition of garnet with determined Fe3+/∑Fe
Sample	TU13-A2-3	TU14-B2	TU15	TU16	JPI-X2	JPN3A	JPN3b	JPN4	JPN9	JPN11	JPS1	JPS4	JPS6A	JPS6B	K11-A14	K13-B4	NIC	X04	X05	X07a
locality	Pelly Bay	Pelly Bay	Pelly Bay	Pelly Bay	Somerset I.	Somerset I.	Somerset I.	Somerset I.	Somerset I.	Somerset I.	Somerset I.	Somerset I.	Somerset I.	Somerset I.	Somerset I.	Somerset I.	Somerset I.	Somerset I.	Somerset I.	Somerset I.
SiO2	41.5416	41.3996	41.355	41.0934	41.524	42.313	42.1279	42.5348	42.234	41.6858	40.1584	40.7776	42.1994	42.608	40.7569	41.0668	40.5007	43.27	41.0235	41.2
TiO2	0.06167	0.05887	0.166	0.06408	0.0889	0.2376	0.257737	0.206485	0.0856087	0.24875	0.1174	0.2648	0.264088	0.261574	0.324213	0.0914	0.36397	0.161647	0.33743	0.1
Al2O3	20.2032	23.11	22.527	20.4163	20.992	19.931	19.9211	20.5915	20.557	17.7192	17.755	17.488	20.7832	20.9033	17.6191	17.8904	17.0674	21.9035	20.2794	18
Cr2O3	4.8986	1.21925	1.53	4.9648	4.186	4.86	4.96158	4.06818	4.224	7.9075	8.065	8.1252	3.82471	3.84	7.95973	7.9926	8.7075	2.59882	4.5458	8.5
FeO	8.5831	9.3989	10.623	8.9555	7.339	6.587	6.54737	6.54182	7.305	6.88917	6.3016	6.2908	6.89706	6.814	6.73387	6.3958	6.3787	7.32647	6.3605	5.9
MnO	0.53185	0.53185	0.461	0.5698	0.4081	0.3362	0.332105	0.325424	0.420783	0.36475	0.34554	0.3566	0.337088	0.33182	0.36852	0.3299	0.32694	0.396588	0.29833	0.3
MgO	19.0282	19.3843	18.605	19.1507	20.944	20.773	20.8805	21.6709	20.539	20.4133	19.3392	20.0092	21.7165	21.54	19.1192	19.8188	19.1859	21.9829	20.4978	20.3
NiO	0.0054	not det.	0.004	not det.	0.0084	0.0118	0.0124211	0.0107273	0.00991304	0.00904167	0.00994	0.00916	0.00811765	0.0107869	0.00689333	0.00878	0.00752	0.0108824	0.00891	not det.
CaO	5.1982	4.6347	4.917	5.1688	5.269	5.294	5.41474	5.18061	5.179	6.12708	6.1496	6.74	4.72382	4.72	6.27827	5.9096	6.5695	4.66059	5.1852	6.1
Na2O	0.0483	0.03253	0.042	0.04969	0.0535	0.0466	0.0474211	0.044697	0.0414783	0.0505417	0.03368	0.04088	0.0526471	0.0484098	0.0471867	0.02922	0.04084	0.0628235	0.04565	0
total	100.1	99.77	100.23	100.433	100.813	100.39	100.503	101.175	100.596	101.415	98.2754	100.102	100.807	101.078	99.2139	99.5333	99.149	102.374	98.5825	100.4
Mg#	0.798054	0.786157	0.757396	0.79218	0.835717	0.848977	0.850407	0.855178	0.833663	0.840812	0.845453	0.85007	0.848775	0.849282	0.835014	0.846711	0.842806	0.842483	0.851733	0.85981
Cr#	0.139915	0.0341866	0.0435819	0.140268	0.118	0.140596	0.143176	0.117037	0.121156	0.23042	0.233574	0.237642	0.109899	0.109726	0.232599	0.230613	0.255005	0.0737341	0.130731	0.240596
Fe3+/∑Fe	0.071c	0.044c	0.031c	0.064c	0.037b	0.060b	0.072b	0.060b	0.050b	0.059b	0.112c	0.067b	0.042b	0.048b	0.110c	0.120c	0.136c	0.030b	0.095c	not measured
a as reported by Bragagni et al. (2017)
b determined by Mössbauer spectroscopy
c determined by microprobe flank method (see methods)
