# Supplementary material for: Oxidation state and metasomatism of the lithospheric mantle beneath the Rae Craton, Canada: strong gradients reflect craton formation and evolution
Source: Sci Rep. 2021 Feb 11;11:3684. doi: 10.1038/s41598-021-83261-6 (PMC7878471; doi:10.1038/s41598-021-83261-6)
Supplement: Supplementary file 6 — Supplementary Table 5. [file 41598_2021_83261_MOESM6_ESM.xlsx]

## Sheet: Tabelle1
Supplementary Table 5. Major element composition of spinel with determined Fe3+/∑Fe
Sample	TU13-A2-3	TU16	TU18	JP3-X1	JPN2	JPN9	JPS1	K11-A18	K13-A1	K13-A3	K13-A4	K13-A5	K15-A4	NIC	N2B	X07
locality	Pelly Bay	Pelly Bay	Pelly Bay	Somerset I.	Somerset I.	Somerset I.	Somerset I.	Somerset I.	Somerset I.	Somerset I.	Somerset I.	Somerset I.	Somerset I.	Somerset I.	Somerset I.	Somerset I.
SiO2	0.0329	0.0361538	0.04444	0.0785556	0.1016	0.05375	0.0942609	0.0367333	0.02076	0.0249429	0.0174444	0.01	0.0360455	0.132385	0.0456471	0.119167
TiO2	0.0105	0.578308	0.03628	2.72778	2.566	0.735125	1.96261	0.142933	0.05424	0.112343	0.0707778	0.17	0.0109545	1.14562	0.081	0.269111
Al2O3	38.2955	10.5754	41.1812	6.84667	10.894	13.2737	11.7613	31.108	41.102	33.5976	46.0339	39.42	38.2632	13.8608	16.0941	9.04333
Cr2O3	31.5265	54.5946	27.1056	55.8833	52.072	52.205	52.6013	37.888	29.0888	37.0446	22.8228	30.25	31.1418	53.52	55.0529	60.69
FeO	13.164	22.0985	14.0716	18.9939	20.63	20.285	17.7961	16.1793	11.5004	12.842	13.2222	11.37	12.9441	16.3277	15.0691	15.8894
MnO	0.18675	0.303538	0.18796	0.270389	0	0	0.240565	0.233267	0.173	0.201657	0.165	0.14	0.183227	0.250385	0.250647	0.231111
MgO	16.692	11.0754	16.2136	13.9	13.904	13.4487	14.4974	14.84	18.3064	16.7157	18.0844	18	16.7214	14.8123	14.0438	13.99
NiO	0.1047	0.0964615	0.13168	0.184778	0.1952	0.1315	0.182565	0.0740667	0.14436	0.102486	0.170556	0.14	0.103273	0.158231	0.0845588	0.128556
total	100.013	99.3583	98.9724	98.8854	100.363	100.133	99.1361	100.502	100.39	100.641	100.587	99.5	99.404	100.207	100.722	100.361
Mg#	0.459	0.471	0.671	0.565	0.553	0.539	0.589	0.651	0.714	0.703	0.707	0.738	0.708	0.608	0.619	0.609
Cr#	0.8	0.776	0.309	0.845	0.761	0.725	0.749	0.415	0.342	0.398	0.253	0.34	0.346	0.751	0.698	0.819
Fe3+/∑Fe	0.22b	0.21b	0.010b	0.25b	0.27b	0.310a	0.24b	0.07b	0.04b	0.03b	0.09b	0.10b	0.03b	0.20b	0.09b	0.260a
a determined by Mössbauer spectroscopy
b determined by microprobe using secondary standards (see methods)
