# Supplementary material for: Oxidation state and metasomatism of the lithospheric mantle beneath the Rae Craton, Canada: strong gradients reflect craton formation and evolution
Source: Sci Rep. 2021 Feb 11;11:3684. doi: 10.1038/s41598-021-83261-6 (PMC7878471; doi:10.1038/s41598-021-83261-6)
Supplement: Supplementary file 7 — Supplementary Table 6. [file 41598_2021_83261_MOESM7_ESM.xlsx]

## Sheet: REE ppm grt
Supplementary Table 6. Trace element concentrations in garnet
sample	TU13-A2-3	TU-14-B2	TU15	TU16	JPI-X2	JPN3A	JPN3B	JPN4	JPN9	JPN11	JPS1	JPS4	JPS6A	JPS6B	K11A14	K13B4	NIC	X04	X05
locality	Pelly Bay	Pelly Bay	Pelly Bay	Pelly Bay	Somerset I.	Somerset I.	Somerset I.	Somerset I.	Somerset I.	Somerset I.	Somerset I.	Somerset I.	Somerset I.	Somerset I.	Somerset I.	Somerset I.	Somerset I.	Somerset I.	Somerset I.
garnet type	D	A	A	D	B	D	D	D	D	D	C	C	D	D	D	C	D	D	D
element
Li	0.2105	1.30333	0.819231	0.222667		0.637	0.108	0.46575	0.38375	0.7034	0.865	0.174	0.145	0.4235	0.371444	0.494333	0.48625	0.15425	0.1215
Sc	157.878	126.963	85.6577	135.161	110.422	147.435	150.35	137.941	126.946	168.353	252.477	153.613	94.9873	92.8754	168.452	178.277	169.12	86.3738	125.472
Ti	421.659	293.053	1265.46	491.465	454.313	1559.37	1643.68	1024.15	562.059	1259.79	737.701	1296.85	1312.74	1633.02	2627.42	731.818	2949.48	1115.75	2530.55
V	164.122	118.91	137.281	206.055	151.99	215.331	222.383	203.884	141.517	254.21	322.107	241.95	177.83	170.486	316.389	364.011	327.776	133.408	273.895
Mn	3817.49	6828.38	3742.75	4550.62	3091.6	2321.35	2430.7	2402.34	3074.79	2645.17	3236.87	2399.82	2451.45	2333	3355.81	2860.06	2890.24	2733.15	2486.83
Co	44.8373	52.81	47.6838	49.179	40.4711	42.8773	42.45	43.3	39.385	42.821	52.6129	37.46	42.546	49.5369	49.945	50.7989	50.239	41.2944	49.674
Ni	26.32	12.0967	11.8731	24.328	31.8589	71.8036	69.4525	66.4589	30.5938	67.456	80.7271	54.71	58.452	292.611	72.2672	82.8078	92.245	37.7663	81.945
Zn	14.3447	12.6467	27.0162	19.463	12.6711	11.5209	11.5975	13.7178	9.7775	13.979	14.6757	10.6167	14.924	16.5069	15.865	15.0711	16.876	11.3637	17.94
Ga	4.14	7.44333	6.65231	6.881	6.43667	2.86545	3.055	4.73	3.86	3.996	2.67429	4.82667	9.008	7.16815	6.98333	4.53889	7.171	6.35562	9.138
Sr	0.655333	0.279667	0.415677	0.4234	6.125	0.369182	0.18225	0.832333	0.36925	1.8798	0.613286	0.404333	0.263214	0.315615	0.5945	0.371667	0.7317	0.154625	0.407
Y	22.7713	22.0033	21.8115	22.405	14.9989	7.71818	7.92	13.3611	16.6725	17.152	5.74714	5.91333	17.2357	14.8049	15.8178	3.53778	13.487	17.7269	18.284
Zr	49.95	7.80333	20.0792	19.868	16.5356	32.8509	32.035	63.688	37.385	97.716	119.73	58.2833	58.416	48.7876	59.06	54.4856	70.266	14.8913	35.304
Sn	0.187133	0.056	0.0875385	0.1582	0.230444	0.225545	0.21125	0.356778	0.166357	0.4823	0.595286		0.389333	0.155062	0.603833	0.390111	0.5091	0.137123	0.2379
Ba	0.0835467	0.485333	0.051425	0.0704	10.1678	0.32625	0.363				0.367		0.129	0.7366	2.63862	0.0393333	1.10075	0.053	0.02875
La	0.143133	0.0586667	0.0687644	0.06197	1.19889	0.0323273	0.015	0.0353333	0.0248	0.0256	0.0581	0.0258333	0.0176	0.0195308	0.0531389	0.0103889	0.0205222	0.0127875	0.03355
Ce	1.204	0.125667	0.0854292	0.664	3.01333	0.180218	0.1462	0.268889	0.374875	0.2099	0.420429	0.355667	0.248091	0.209538	0.289444	0.178011	0.221	0.134775	0.4167
Pr	0.482667	0.0195	0.0214285	0.2691	0.374444	0.0687273	0.043725	0.0832222	0.1815	0.0702	0.140543	0.186	0.0977692	0.0837538	0.1201	0.167611	0.11456	0.0549063	0.1276
Nd	5.48133	0.214	0.285923	3.148	2.09889	0.640909	0.5855	0.965556	2.18	0.95	1.75857	2.61	0.939286	0.895462	1.61256	3.87444	1.6587	0.527625	1.311
Sm	4.17867	0.396667	0.542615	2.905	0.976667	0.810091	0.8055	1.01778	1.80375	1.394	3.13714	2.01	0.777857	0.781969	1.62472	3.14667	1.459	0.51975	0.999
Eu	1.80067	0.261667	0.319462	1.152	0.407667	0.395727	0.36175	0.528667	0.761125	0.768	1.99	0.758	0.408143	0.410917	0.737167	0.978889	0.6173	0.290687	0.45
Gd	6.31733	1.36333	1.74538	2.901	1.46556	1.30891	1.4075	1.903	2.7225	3.156	7.53571	1.94333	1.6	1.61	2.76667	2.47556	2.2256	1.35756	1.925
Tb	0.982	0.36	0.410538	0.4445	0.257222	0.225545	0.23175	0.319333	0.439375	0.549	0.621143	0.221667	0.328357	0.36125	0.470056	0.277778	0.4032	0.31125	0.389
Dy	5.44533	3.16667	3.54615	3.605	2.04111	1.46264	1.435	2.233	3.0675	3.435	1.90143	1.31233	2.61357	2.61837	3.145	1.15733	2.801	2.665	3.043
Ho	0.852	0.783333	0.84	0.859	0.525444	0.282364	0.27475	0.453889	0.6445	0.6052	0.217429	0.224333	0.617214	0.598417	0.6105	0.140233	0.5525	0.648187	0.7
Er	1.84267	2.58667	2.65692	2.783	1.72444	0.818182	0.817	1.2426	1.8675	1.3695	0.426	0.507333	1.80071	1.86083	1.70367	0.275444	1.4695	2.14312	2.237
Tm	0.234267	0.43	0.416692	0.4437	0.233	0.132273	0.134	0.176	0.275625	0.1489	0.0505286	0.0725333	0.2365	0.257338	0.244111	0.0394556	0.20592	0.329063	0.3461
Yb	1.43467	3.45	2.88538	3.191	1.67889	1.07	1.1065	1.2701	2.07625	0.9366	0.382857	0.590333	1.63933	1.98583	1.69294	0.371667	1.3659	2.51875	2.557
Lu	0.214333	0.57	0.454692	0.49	0.277222	0.191364	0.18425	0.256222	0.334875	0.1562	0.0814143	0.107167	0.276133	0.282235	0.264556	0.0816778	0.21358	0.403562	0.413
Hf	0.415467	0.124	0.500077	0.2678	0.2165	0.829909	0.8225	1.0436	0.449625	1.687	1.67086	1.39467	1.06253	0.952885	1.14394	1.37978	2.0233	0.24	0.84

## Sheet: REE ppm cpx
Supplementary Table 6. Trace element concentrations in clinopyroxene
sample	TU13A23	TU16	TU18	JPI-X2	JPN4	JPN9	JPN11	JPS4	JPS6A	JPS6B	K13A1	K13A3	K13A4	K13A5	X04	X05
locality	Pelly Bay	Pelly Bay	Pelly Bay	Somerset I.	Somerset I.	Somerset I.	Somerset I.	Somerset I.	Somerset I.	Somerset I.	Somerset I.	Somerset I.	Somerset I.	Somerset I.	Somerset I.	Somerset I.
Cpx type	enriched	enriched	flat	enriched	enriched	enriched	enriched	enriched	enriched	enriched	flat	flat	flat	depleted	enriched	enriched
element
Li	1.50444	0.802	9.95857	0.788375	0.6306	0.932571	0.5116	0.9485	0.570167	1.55483	1.07733	8.40333	1.76	0.5152	0.895	0.953824
Sc	45.8511	36.734	68.4743	20.0288	26.01	39.6257	29.23	28.62	24.4383	22.34	186.513	138.71	87.2033	99.13	40.0989	21.49
Ti	465	598.466	288.769	484.281	1324.3	1018.64	587.848	1069.99	1258.48	1475.62	431.587	599.753	2715.68	5701.45	1492.99	1536.94
V	388.038	527.85	177.046	282.062	288.236	395.09	263.538	260.025	365.958	293.987	194.79	231.55	314.44	491.522	325.514	300.184
Mn	636.038	500.436	450.246	391.904	740.202	544.211	694.066	644.433	671.298	552.347	1115.98	648.443	653.91	575.376	924.118	704.575
Co	20.1433	14.688	13.0829	13.6075	26.198	17.3671	25.856	23.625	24.1483	18.8617	74.1733	39.5567	19.1467	15.038	23.2389	25.8153
Ni	312.699	265.148	232.99	219.079	445.05	304.48	444.834	397.017	417.947	334.473	417.66	836.713	294.02	258.964	299.169	441.073
Zn	10.23	10.294	10.9586	11.7387	15.186	8.82714	13.328	11.7975	14.4317	12.3267	17.79	65.0667	12.2667	25.43	10.6733	13.2641
Ga	9.29222	5.344	1.35571	6.31625	3.954	4.40714	2.3868	4.3275	7.555	7.55167	6.19267	5.88167	3.43	5.246	5.85111	5.60706
Sr	725.698	558.47	16.9614	257.306	118.748	388.71	70.142	203.775	171.055	136.363	36.5867	68.95	146.47	7.932	218.539	122.808
Y	5.78667	1.986	4.82	1.78575	2.604	3.32	1.2634	2.35	2.32267	2.14333	2.82667	5.10333	13.0267	11.916	6.71778	2.25529
Zr	65.6644	37.896	2.31286	33.7625	32.468	73.8971	19.034	39.065	40.56	38.6983	10.7633	10.9233	16.9667	4.058	50.8556	21.0894
Sn	1.04889	0.934	0.0665714	0.344125	0.627	0.482714	0.4016	1.20975	0.576333	0.438667	0.162333	0.182	0.255	0.4222	0.428222	0.530941
Ba	28.5311	0.0914	0.876	62.6075	7.2402	2.90157	3.2062	29.0675	4.58333	20.9197	63.3267	87.59	0.273333	7.198	4.87162	1.63176
La	29.2978	24.26	2.45571	17.3012	3.294	7.67571	1.198	7.98	3.435	2.51167	1.25033	2.00767	2.05	0.06694	5.18249	2.25176
Ce	99.2922	71.65	5.33429	55.3563	12.488	32.4114	4.688	19.0475	15.2217	8.91	3.22	5.79	6.36333	0.1556	19.3236	8.48765
Pr	14.9744	9.756	0.621143	5.75125	1.6	5.87143	0.628	2.075	2.11	1.52867	0.471667	0.866	0.986	0.0296	3.16978	1.42488
Nd	67.4967	43.038	2.68857	20.3625	7.456	29.37	3.014	9.61	9.30167	7.49167	2.32333	3.90333	5.09333	0.298	15.0894	7.11353
Sm	11.0244	7.242	0.533	2.40375	1.702	5.92	0.886	1.7475	1.86833	1.684	0.573	0.97	1.58333	0.338	3.133	1.61729
Eu	2.68889	1.554	0.157143	0.56375	0.5406	1.54986	0.3048	0.4925	0.545333	0.471667	0.165333	0.315667	0.592667	0.2376	0.887	0.460118
Gd	5.93556	2.586	0.592857	1.30688	1.374	3.62	0.8602	1.2	1.43	1.15667	0.491	0.886667	2.07	1.294	2.47222	1.20553
Tb	0.532222	0.1838	0.0974286	0.0999375	0.1428	0.328286	0.0912	0.1295	0.1375	0.126533	0.0652333	0.160333	0.339	0.3098	0.279333	0.136729
Dy	2.06111	0.758	0.761429	0.459875	0.711	1.29143	0.384	0.618	0.6375	0.601667	0.450333	0.899333	2.44	2.458	1.56967	0.669529
Ho	0.247444	0.0856	0.181143	0.072075	0.10152	0.142143	0.0519	0.097875	0.0929667	0.100617	0.0972	0.194667	0.487667	0.483	0.272	0.0935353
Er	0.426222	0.1628	0.578571	0.15025	0.2034	0.260857	0.0958	0.19375	0.170833	0.157	0.397333	0.509	1.45	1.3	0.702111	0.187824
Tm	0.0394	0.0152	0.0932857	0.0155571	0.01738	0.0290429	0.0066	0.01905	0.0175167	0.0247667	0.0755333	0.0764	0.198667	0.1642	0.0941222	0.0223765
Yb	0.198	0.0672	0.664286	0.106	0.0936	0.115571	0.0409	0.10075	0.0965	0.117667	0.698	0.542	1.33667	0.9736	0.671125	0.104594
Lu	0.0231889	0.00724	0.0997143	0.0168	0.01254	0.0132857	0.00612	0.0089	0.0125167	0.0145833	0.118733	0.0766	0.184333	0.1244	0.0891	0.0132706
Hf	1.74556	1.436	0.0937143	0.884125	1.784	1.95143	1.1104	1.9775	2.13833	1.79833	0.266	0.402333	0.708	0.2092	1.66	0.874412
