# Supplementary material for: Oxidation state and metasomatism of the lithospheric mantle beneath the Rae Craton, Canada: strong gradients reflect craton formation and evolution
Source: Sci Rep. 2021 Feb 11;11:3684. doi: 10.1038/s41598-021-83261-6 (PMC7878471; doi:10.1038/s41598-021-83261-6)
Supplement: Supplementary file 8 — Supplementary Table 7. [file 41598_2021_83261_MOESM8_ESM.xlsx]

## Sheet: Tabelle1
Supplementary Table 7. Summary of samples investigated along with their equilibration conditions, including oxidation state
sample	Rock type	T [°C]a	P [GPa]a	Depth [km]b	Garnet type	∆logƒO2 [FMQ]	∆logƒO2 [FMQ]
						Garnetc	Spineld
Pelly Bay
TU13-A2-3	gt-sp lherz	905	4	129.76	D	-1.35	0.524
TU14-B2	gt lherz	815	3.5	113.54	A	-1.74
TU-15	gt lherz	785	3.3	107.052	A	-1.99
TU-16	gt-sp	893	4	129.76	D	-1.44	0.412
TU-18	sp lherz	674	2.5	81.1			-4.125
Somerst Island
JPI-X2	gt-sp lherz	949	3.33	107.892	B	-2.27
JP3-X1	sp harz	1143	4.5	145.8			0.122
JPN 2	gt-sp lherz	1150	4.5	145.8			-0.132
JPN 3a	gt harz	1139	3.97	128.628	D	-2.08
JPN 3b	gt perid	1085	3.79	122.796	D	-1.67
JPN 4	gt lherz	1197	4.55	147.42	D	-2.57
JPN 9	gt-sp lherz	888	3.06	99.144	D	-1.34	1.083
JPN 11	gt lherz	1057	3.63	117.612	D	-1.87
JPS 1	gt-sp harz	1092	3.5	113.4	C	-0.84	0.294
JPS 4	gt-sp lherz	1132	4.14	134.136	C	-2.21
JPS 6a	gt lherz	1147	4.21	136.404	D	-2.86
JPS 6b	gt lherz	1146	4.14	134.136	D	-2.58
K11-A14	gt Lherz	1006	3.6	116.64	D	-0.84
K11-A18	gt-sp Lherz	827	3.2	103.68			-1.429
K13-A1	sp lherz	900	3.5	113.4			-3.02
K13-A3	sp lherz	887	3.5	113.4			-3.608
K13-A4	sp lherz	827	3.3	106.92			-1.366
K13-A5	sp lherz	989	3.6	116.64			-1.807
K13-B4	gt lherz	1038	3.6	116.64	C	-0.73
K15-A4	gt-sp lherz	843	3.3	106.92			-3.498
NIC	gt-sp lherz	1059	3.48	112.752	D	-0.5	-0.142
N2B	gt-sp lherz	1004	4	129.6			-1.583
X04	gt lherz	1035	3.87	125.388	D	-3.05
X05	gt- lherz	1132	3.8	123.12	D	-1.33
X07	gt-sp lherz	1008	4.32	139.968			0.206
a see methods for calibration used
b depth = pressure [GPa]*32.4
c relative to FMQ reference equilibrium and calculated after Stagno et al. (2013)
d relative to FMQ reference equilibrium and calculated after Wood et al. (1990)
